# Supplementary material for: Reconstituting donor T cells increase their biomass following hematopoietic stem cell transplantation
Source: Royal Society of Chemistry journal article supplement (doi:10.1039/c8an00148k), 2018-01-01
Supplement: c8an00148k1.xlsx [file c8an00148k1.xlsx]

## Sheet: Table 1
	n=18
Median Age, y (range)	49 (24-65)
Gender
Female	9
Male	9
Disease
Acute lymphoblastic leukemia	3
Hodgkin's lymphoma	2
Myelodysplastic syndromes	4
Chronic myelogenous leukemia	1
Non-Hodgkin's lymphoma	3
Acute myeloid leukemia	2
Multiple myeloma	1
Myelofibrosis	2
Donor Type
Matched unrelated	11
Matched related	3
Autologous	4
Conditioning Regimen
TBI/Cyclophosphamide	2
Busulfan/Cyclophosphamide	6
Busulfan/Fludarabine	4
Fludarabine/Melphalan	2
BEAM	3
Melphalan	1
CMV Status (Donor/Recipient)
+/+	7
+/-	3
-/+	4
-/-	0
GVHD Prophylaxis
Tacrolimus-Methotrexate	6
Tacrolimus-Mycophenolate mofetil	4
Cyclosporin A-Methotrexate	2
Cyclosporin A-Mycophenolate mofetil	1
Median CD34 Dose (E6 cells/kg) (range)	4.59 (3.11-9.40)
*Scheduling and dosing for conditioning regimens were as follows:
•TBI/Cy 2 Gy TBI in 6 fractions bid days -6, -5, -4; Cyclophosphamide 60mg/kg/day days -3, -2
•Bu/Cy Busulfan 0.8 mg/kg for 16 doses days -7, -6, -5, -4, -3; Cyclophosphamide 60 mg/kg/day days -3, -2
•Bu/Flu Fludarabine 40 mg/m2 days -5, -4, -3, -2; Busulfan 130 mg/m2 days -4, -3, -2
•Flu/Mel Fludarabine 30 mg/m2 days -6, -5, -4, -3; Melphalan 140 mg/m2 day -2
•BEAM Carmustine 300 mg/m2 day -7; ara-C 100 mg/m2) for 8 doses days -6, -5, -4, -3; Etoposide 100mg/m2
for 8 doses days -6, -5, -4, -3; Melphalan 140 mg/m2 day -2
•Melphalan 200mg/m2 day -2
